# Supplementary material for: Transcriptional regulation-mediating ROS homeostasis and physio-biochemical changes in wild tomato (Solanum chilense) and cultivated tomato (Solanum lycopersicum) under high salinity
Source: PubMed Central journal article supplement — Saudi J Biol Sci. 2020 Jun 24;27(8):1999–2009. doi: 10.1016/j.sjbs.2020.06.032 (PMC7376111; doi:10.1016/j.sjbs.2020.06.032), 2020-06-24
Supplement: mmc1.pdf [file mmc1.pdf]

## Supplement data in brief

### Title:

**Transcriptional regulation-mediating ROS homeostasis and physio-biochemical changes in wild tomato (*Solanum chilense*) and cultivated tomato (*Solanum lycopersicum*) under high salinity**

### Authors:

SP Kashyap<sup>1,2</sup>, Nishi Kumari<sup>2</sup>, Pallavi Mishra<sup>1</sup>, Durga Prasad Moharana<sup>1,3</sup>, Mohd Aamir<sup>4</sup>, B Singh<sup>1</sup>, and HC Prasanna<sup>1,5</sup>

### Authors' affiliations:

<sup>1</sup>*Division of Crop Improvement, Indian Institute of Vegetable Research, Indian Council of Agricultural Research, Varanasi-221 305, Uttar Pradesh, India*

<sup>2</sup>*Department of Botany, Mahila Maha Vidyalyaya, Banaras Hindu University, Varanasi-221 005, Uttar Pradesh, India*

<sup>3</sup>*Department of Horticulture, Institute of Agricultural Sciences, Banaras Hindu University, Varanasi-221 005, Uttar Pradesh, India*

<sup>4</sup>*Laboratory of Mycopathology and Microbial Technology, Centre of Advanced Study in Botany, Institute of Science, Banaras Hindu University, Varanasi-221 005, Uttar Pradesh, India*

<sup>5</sup>*Division of Vegetable Crops, Indian Institute of Horticultural Research, Indian Council of Agricultural Research, Hessaraghatta, Lake Post, Bengaluru-560 089, Karnataka, India.*

### \*Corresponding author

Dr. HC Prasanna, Principal Scientist (Genetics and Plant Breeding)

Division of Crop Improvement, Indian Institute of Vegetable Research, Indian Council of Agricultural Research, Shahanshahpur, Jakhini, Varanasi-221 305, Uttar Pradesh, India

Email: [prasanahc@yahoo.com](mailto:prasanahc@yahoo.com), [prasanna.c@icar.gov.in](mailto:prasanna.c@icar.gov.in)

Mobile: +91-9455178097

### Email address of authors

[singhsarvesh10@gmail.com](mailto:singhsarvesh10@gmail.com) (SP Kashyap); [kumaridrnishi@yahoo.co.in](mailto:kumaridrnishi@yahoo.co.in) (Nishi Kumari); [pallavimishra23@gmail.com](mailto:pallavimishra23@gmail.com) (Pallavi Mishra); [dpmhort03@gmail.com](mailto:dpmhort03@gmail.com) (Durga Prasad Moharana); [khan.aamir18@gmail.com](mailto:khan.aamir18@gmail.com) (Mohd Aamir); [bsinghiivr@gmail.com](mailto:bsinghiivr@gmail.com) (B Singh); [prasanahc@yahoo.com](mailto:prasanahc@yahoo.com) (HC Prasanna)

## Supplemental Fig. S1

Multivariate principal component analysis. (A) loadings values (B) eigenvalues of the first two factors (PCs) of physiological and biochemical parameters related attributes (C) loadings values (D) eigenvalues of the first two factors (PCs) of different biochemical parameters, and (E) loadings values (F) eigenvalues of the first two factors (PCs) of salt stress time duration associated with *Solanum lycopersicum* and *Solanum chilense*. Fv/Fm, CCI, Total chlorophyll, Carotenoid, Proline, MDA, RWC, EL,  $O_2^{\cdot-}$ ,  $H_2O_2$ , CAT, SOD, APX, GR, DHAR, MDHAR, GPX, glutathione; GSH, GSSG, AsA, RAsA, DHA at 0 d, 7 d, 14 d, and 21 d of salt stress conditions are the variables.

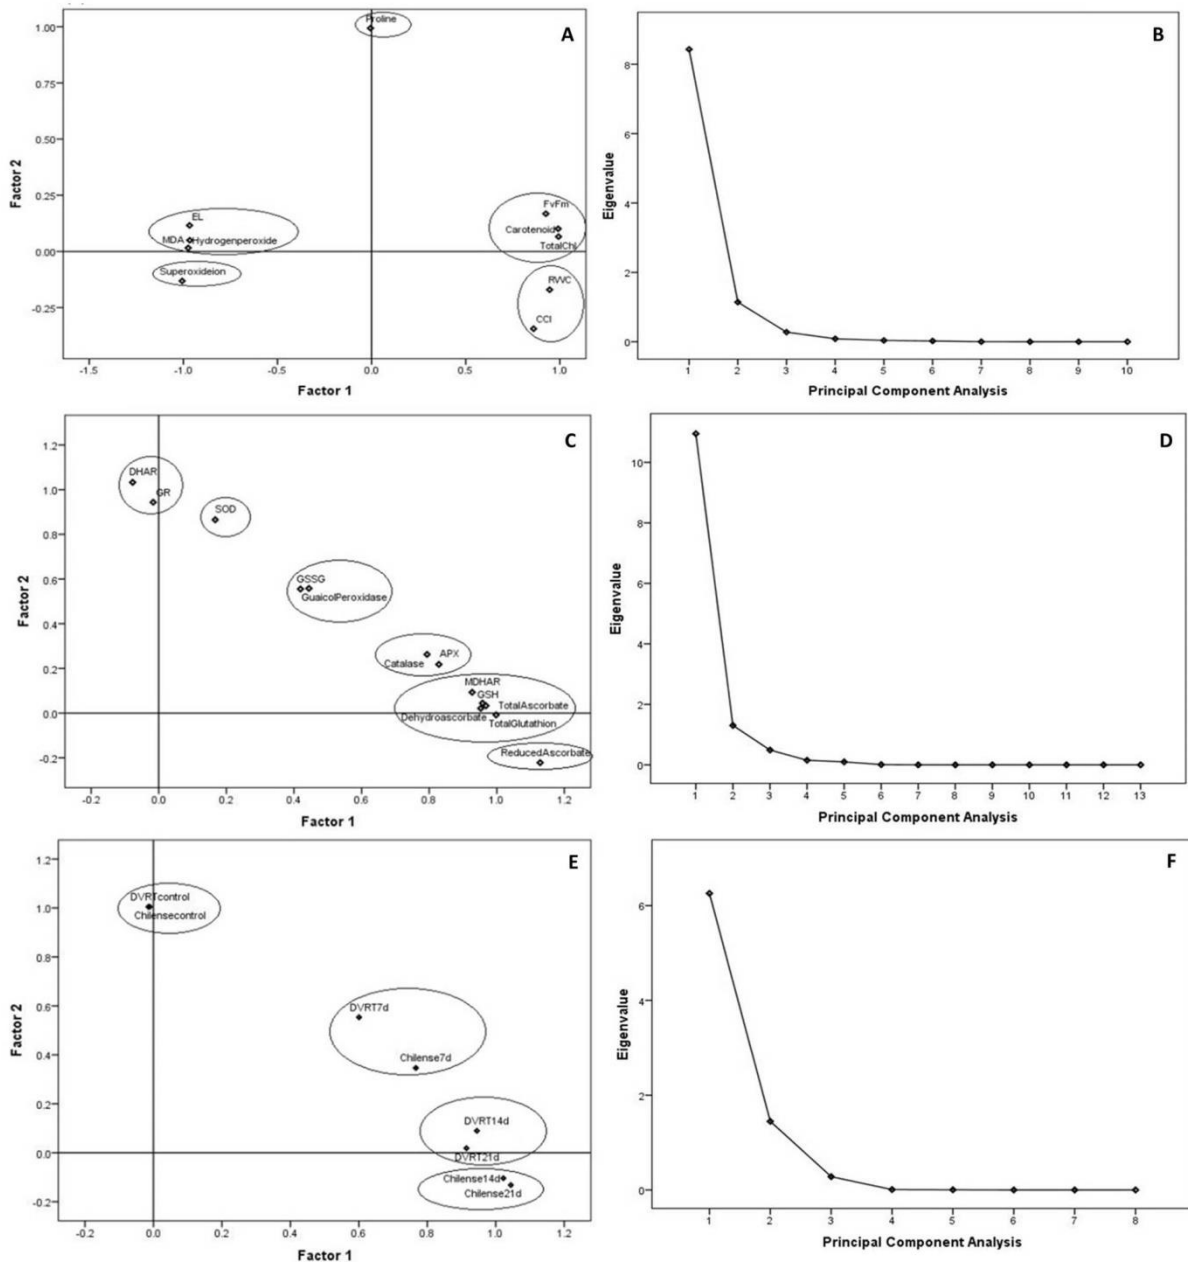

## Supplemental Fig. S2

Heatmap and clustering analysis of antioxidant defence related genes *Solanum lycopersicum* and *Solanum chilense*. The figure includes a “heatmap” which is the part of the figure containing colors (red, blue, and white) with dendrogram. The rows represent genes while the treatments are shown as columns. The row dendrogram represents the gene clusters with similar pattern. The expression levels are mapped on the colour scale provided at the right top of the figure along with the categories scale on the right.

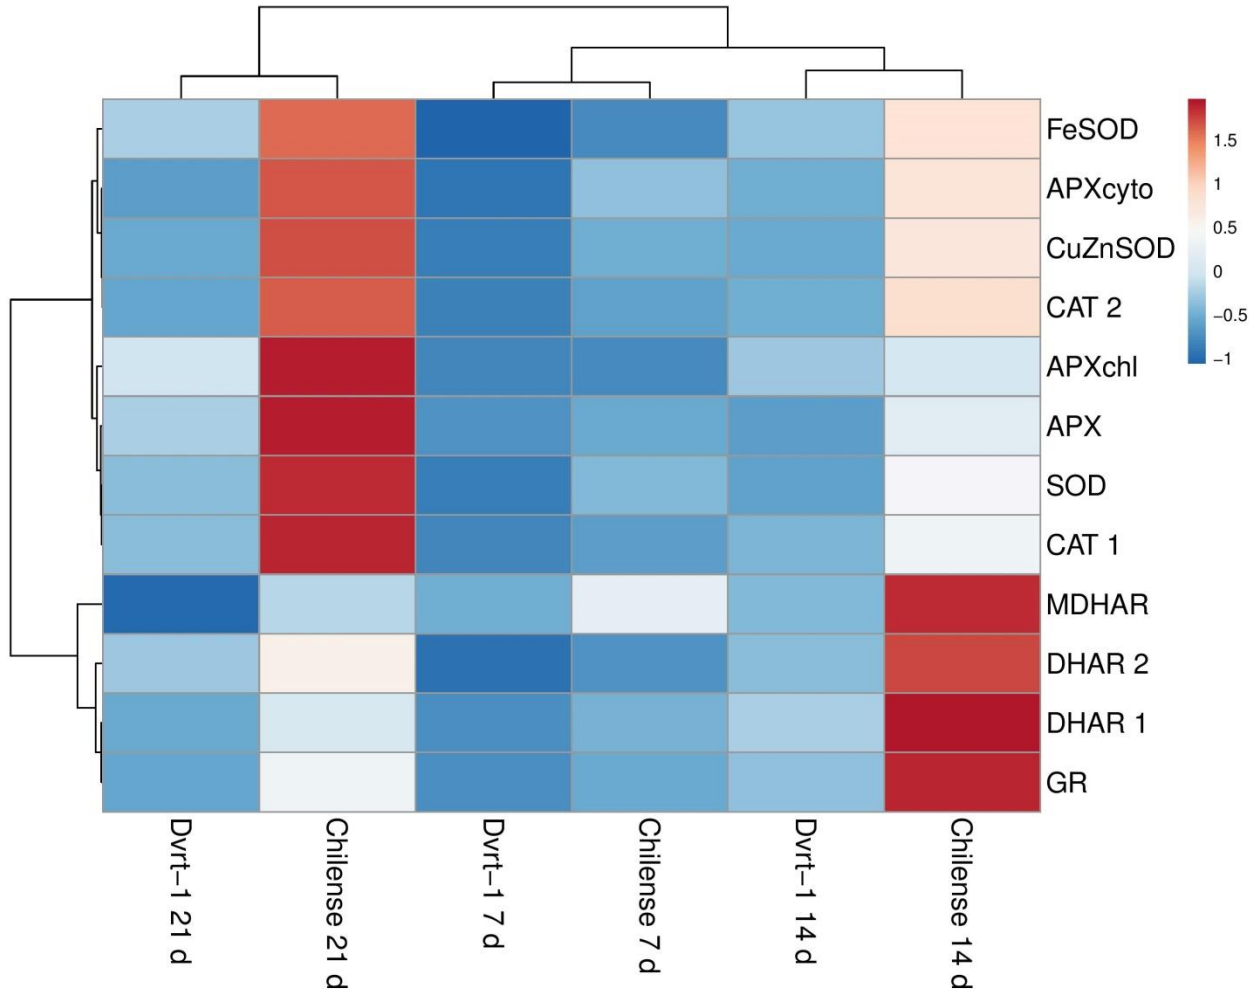

## Supplemental Table S1

Primers used for quantification of mRNA levels by qRT-PCR.

| Gene              | Encoded protein                          | Primer sequence(5'-3')                                           | Accession number |
|-------------------|------------------------------------------|------------------------------------------------------------------|------------------|
| <i>Actin</i>      | Actin                                    | Forward GCTCCACCAGAGAGGAAATAC<br>Reverse GCACTTCCTGTGGACAATAGA   | NM_001330119.1   |
| <i>Catalase 1</i> | Catalase                                 | Forward CATTGAGGAGAACTGGAGGATA<br>Reverse CTGTAATCCGTTGGGAGACAA  | M93719.1         |
| <i>Catalase 2</i> | Catalase                                 | Forward GGGAAACTTTGATCTGGTAGGG<br>Reverse CTCCTGGATATGGGACTTAGGA | AF112368.1       |
| <i>DHAR 1</i>     | Dehydroascorbate reductase               | Forward GAAGTGGAGTGTGCCTGAAA<br>Reverse GACGTACTTCTCTTCAGCCTTG   | AY971873.1       |
| <i>DHAR 2</i>     | Dehydroascorbate reductase               | Forward TGGAACAGAGCAGGCTTTAC<br>Reverse TCAGCAGCAGATACCTCATTTT   | AY971874.1       |
| <i>MDHAR</i>      | Monodehydroascorbate reductase           | Forward CAAGGGTTTTCGGTTCTTCT<br>Reverse TGCATTTCTCCTCCAACACTAC   | AY971875.2       |
| <i>GR</i>         | Chloroplast glutathione reductase        | Forward GCTCACCAAAGCTCAGTACAA<br>Reverse GGAGAGGCTTGATAGGGTTAGA  | EU285581.2       |
| <i>APXchl</i>     | Chloroplast stromal ascorbate peroxidase | Forward CCTCAAAGAGGTGGAGCTAATG<br>Reverse CCTTGATAGGCTGGAGAAGTTT | EU251405.1       |
| <i>APXcyto</i>    | Cytosolic ascorbate peroxidase 1         | Forward TACAGTTGCCGTCAGACAAG<br>Reverse CCTCAGCATAGTCAGCAAAGA    | DQ096286.1       |
| <i>APX</i>        | Ascorbate peroxidase                     | Forward CGCAAAGAGGTGGAGCTAAT<br>Reverse CCTTGATAGGCTGGAGAAGTTT   | AF413573.1       |
| <i>SOD</i>        | Superoxide dismutase                     | Forward AGAAAGCTGTTGCTGTCCTTA<br>Reverse CCAGGAGCAAGTCCAGTTATAC  | M37151.1         |
| <i>Fe SOD</i>     | Iron superoxide dismutase                | Forward TACACACCACTCCTCACCAT<br>Reverse CTTCCCATGACACCAACTTCTC   | AY262025.1       |
| <i>CuZn SOD</i>   | Cytoplasmic Cu-Zn superoxide dismutase   | Forward CGGAAGGATTGCTTGTGGTA<br>Reverse GGCTCAGCAGCTCCAATATAA    | X14040.1         |

**Supplemental Table 2** Correlation coefficient values ( $r$ ) among the different physiological and biochemical parameters of *Solanum lycopersicum* and *Solanum chilense* under 0, 7, 14, and 21 d of salt stress conditions.

|                               | Fv/Fm  | CCI      | Total Chl | Carotenoid | Proline | MDA      | RWC      | EL      | H <sub>2</sub> O <sub>2</sub> | O <sub>2</sub> <sup>•-</sup> |
|-------------------------------|--------|----------|-----------|------------|---------|----------|----------|---------|-------------------------------|------------------------------|
| Fv/Fm                         | 1      |          |           |            |         |          |          |         |                               |                              |
| CCI                           | 0.101  | 1        |           |            |         |          |          |         |                               |                              |
| Total Chl                     | 0.104  | 0.785**  | 1         |            |         |          |          |         |                               |                              |
| Carotenoid                    | -0.032 | 0.721**  | 0.898**   | 1          |         |          |          |         |                               |                              |
| Proline                       | 0.004  | -0.470*  | -0.139    | -0.100     | 1       |          |          |         |                               |                              |
| MDA                           | -0.050 | -0.839** | -0.851**  | -0.805**   | 0.185   | 1        |          |         |                               |                              |
| RWC                           | 0.088  | 0.774**  | 0.871**   | 0.851**    | -0.344  | -0.798** | 1        |         |                               |                              |
| EL                            | -0.076 | -0.878** | -0.901**  | -0.845**   | 0.293   | 0.894**  | -0.862** | 1       |                               |                              |
| H <sub>2</sub> O <sub>2</sub> | 0.009  | -0.786** | -0.800**  | -0.744**   | 0.212   | 0.880**  | -0.821** | 0.855** | 1                             |                              |
| O <sub>2</sub> <sup>•-</sup>  | -0.034 | -0.773** | -0.866**  | -0.848**   | 0.059   | 0.871**  | -0.849** | 0.885** | 0.914**                       | 1                            |

Fv/Fm; CCI, chlorophyll color index; Total Chl, Total chlorophyll; Carotenoid; Proline; MDA, malondialdehyde; RWC, relative water content; EL, electrolyte leakage; O<sub>2</sub><sup>•-</sup>, superoxide anion; H<sub>2</sub>O<sub>2</sub>, hydrogen peroxide: \* and \*\* indicated a significant correlation at  $P \leq 0.05$  and  $P \leq 0.01$ , respectively.

**Supplemental Table 3** Correlation coefficient values (*r*) among the different biochemical parameters of *Solanum lycopersicum* and *Solanum chilense* under 0, 7, 14, and 21 d of salt stress conditions.

|       | CAT     | SOD     | APX     | GR      | DHAR    | MDHAR   | GPX     | Glut    | GSH     | GSSG  | AsA     | RAsA    | DHA |
|-------|---------|---------|---------|---------|---------|---------|---------|---------|---------|-------|---------|---------|-----|
| CAT   | 1       |         |         |         |         |         |         |         |         |       |         |         |     |
| SOD   | 0.770** | 1       |         |         |         |         |         |         |         |       |         |         |     |
| APX   | 0.919** | 0.721** | 1       |         |         |         |         |         |         |       |         |         |     |
| GR    | 0.679** | 0.853** | 0.588** | 1       |         |         |         |         |         |       |         |         |     |
| DHAR  | 0.698** | 0.865** | 0.647** | 0.768** | 1       |         |         |         |         |       |         |         |     |
| MDHAR | 0.917** | 0.707** | 0.847** | 0.565** | 0.630** | 1       |         |         |         |       |         |         |     |
| GPX   | 0.801** | 0.695** | 0.762** | 0.601** | 0.726** | 0.680** | 1       |         |         |       |         |         |     |
| Glut  | 0.826** | 0.552** | 0.820** | 0.409** | 0.521** | 0.798** | 0.693** | 1       |         |       |         |         |     |
| GSH   | 0.814** | 0.668** | 0.764** | 0.643** | 0.572** | 0.838** | 0.728** | 0.733** | 1       |       |         |         |     |
| GSSG  | 0.307   | 0.224   | 0.266   | 0.194   | 0.308   | 0.353   | 0.434*  | 0.373   | 0.281   | 1     |         |         |     |
| AsA   | 0.935** | 0.713** | 0.836** | 0.598** | 0.603** | 0.922** | 0.738** | 0.804** | 0.880** | 0.255 | 1       |         |     |
| RAsA  | 0.826** | 0.417*  | 0.789** | 0.352   | 0.428*  | 0.719   | 0.765** | 0.753** | 0.698** | 0.157 | 0.816** | 1       |     |
| DHA   | 0.850** | 0.679** | 0.697** | 0.607** | 0.530** | 0.831** | 0.642** | 0.674** | 0.876** | 0.276 | 0.922** | 0.692** | 1   |

CAT, catalase; SOD, superoxide dismutase; APX, ascorbate peroxidase; GR, glutathione reductase; DHAR, dehydroascorbate reductase; MDHAR, monodehydroascorbate peroxidase; GPX, guaiacol peroxidase; Glut, glutathione; GSH, reduced glutathione; GSSG, oxidized glutathione; AsA, total ascorbic acid; RAsA, reduced ascorbic acid; DHA, dehydroascorbate: \* and \*\* indicated a significant correlation at  $P \leq 0.05$  and  $P \leq 0.01$ , respectively.
